# Supplementary material
Source: PubMed Central journal article supplement (PMC1413649)

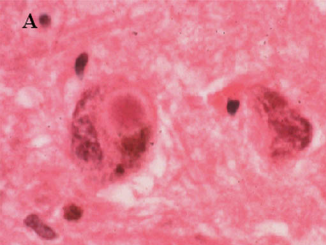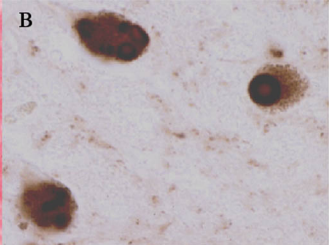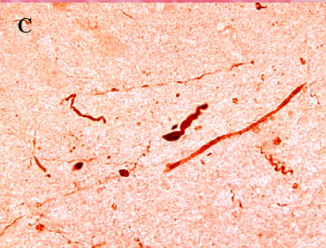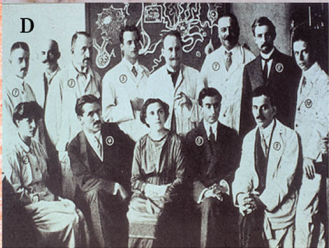

Supplement: pnas_0509567103_1.pdf [file pnas_0509567103_1.pdf]
